# Supplementary material for: Comb-shaped phenolphthalein-based poly(ether sulfone)s as anion exchange membranes for alkaline fuel cells
Source: Royal Society of Chemistry journal article supplement (doi:10.1039/c5ra22774g), 2016-01-01
Supplement: c5ra22774g1.pdf [file c5ra22774g1.pdf]

## *Supplementary Information*

# **Comb-shaped phenolphthalein-based poly (ether sulfone)s as anion exchange membranes for alkaline fuel cells**

Chen Xiao Lin, Yi Zhi Zhuo, Ao Nan Lai, Qiu Gen Zhang, Ai Mei Zhu, Qing Lin Liu\*

*Fujian Provincial Key Laboratory of Theoretical and Computational Chemistry, Department of Chemical & Biochemical Engineering, The College of Chemistry and Chemical Engineering, Xiamen University, Xiamen 361005, P. R. China*

\*Corresponding author:

Q.L. Liu, E-mail: qlliu@xmu.edu.cn, Tel: 86-592-2188072, Fax: 86-592-2184822

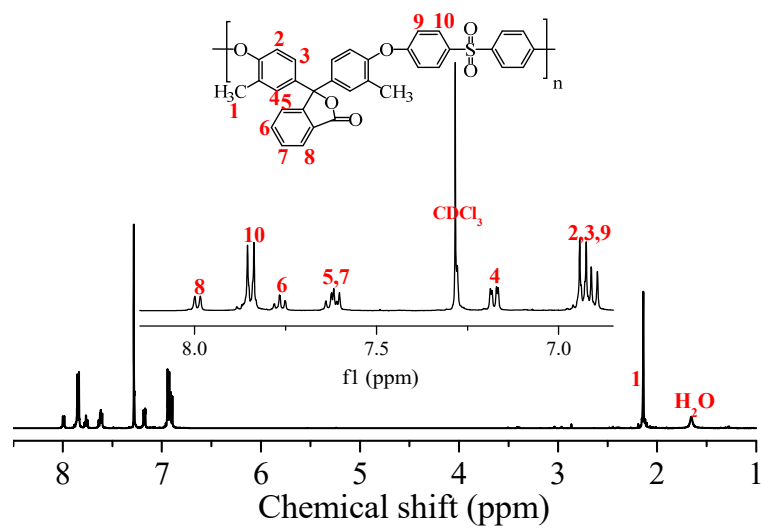

**Fig. S1†** The  $^1\text{H}$  NMR spectra of PES in  $\text{CDCl}_3$ .

**Table S1†** Results of the bromination of PES using different amounts of NBS.

|          | NBS/ $-\text{CH}_3$ <sup>a</sup> | DB (%) <sup>b</sup> | DB (%) <sup>c</sup> | Yield (%) |
|----------|----------------------------------|---------------------|---------------------|-----------|
| PES-B20  | 0.2                              | 20                  | 18.6                | 88        |
| PES-B40  | 0.4                              | 40                  | 35.6                | 91        |
| PES-B60  | 0.6                              | 60                  | 49.8                | 90        |
| PES-B80  | 0.8                              | 80                  | 66.4                | 90        |
| PES-B100 | 1.0                              | 100                 | 82.4                | 82        |

<sup>a</sup> Mole ratio; <sup>b</sup> theoretical value, which is calculated by the mole ratio of NBS to  $\text{CH}_3$ ; <sup>c</sup> experimental value, which is calculated from  $^1\text{H}$  NMR spectrum.

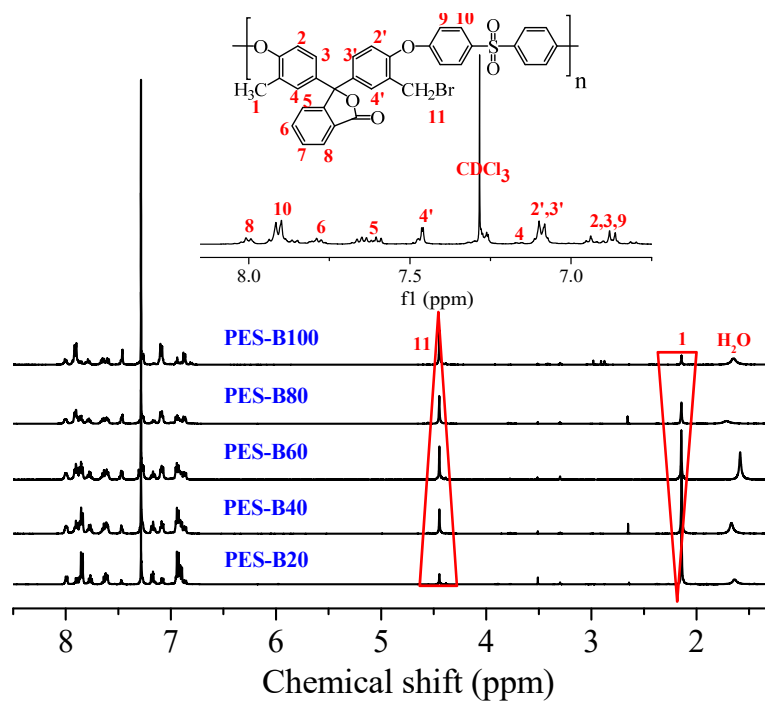

Fig. S2† The  $^1\text{H}$  NMR spectrum of PES-Bx in  $\text{CDCl}_3$ .

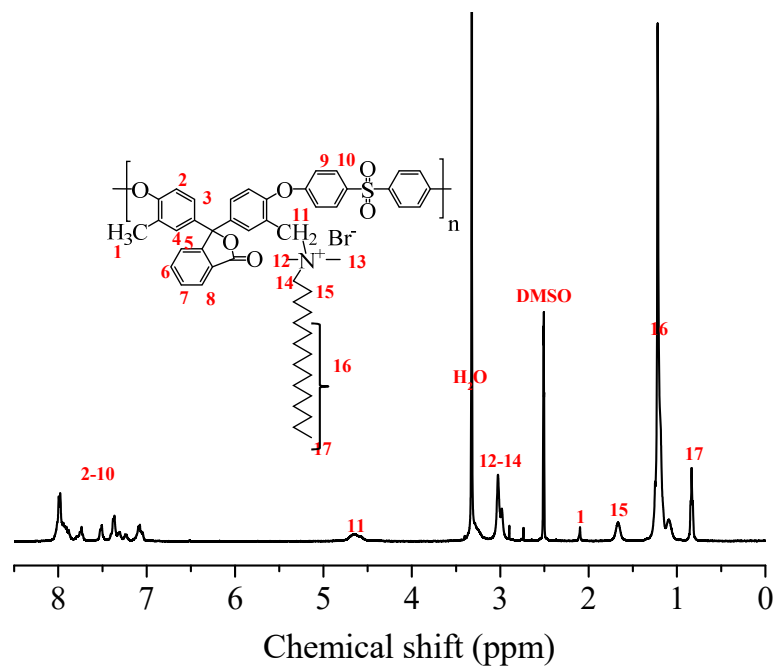

Fig. S3† The  $^1\text{H}$  NMR spectrum of PES-B100-C16 in the bromine form in  $\text{DMSO-d}_6$ .

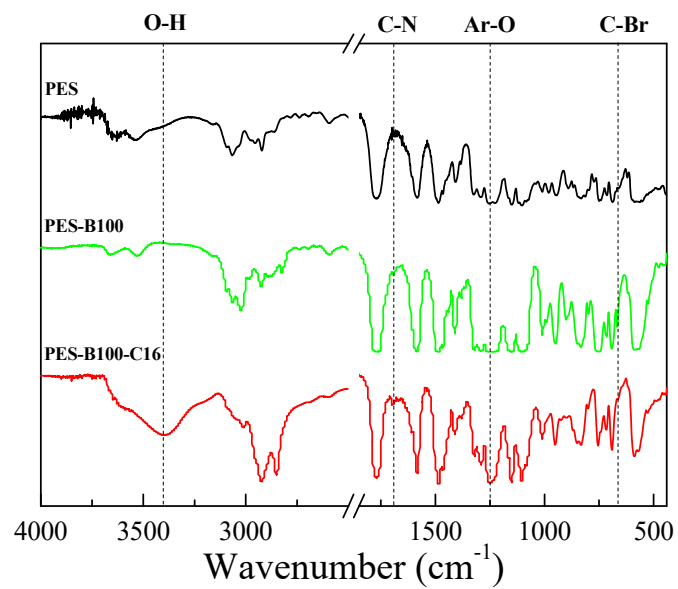

**Fig. S4†** The FT-IR spectra of PES, PES-B100, and PES-B100-C16.

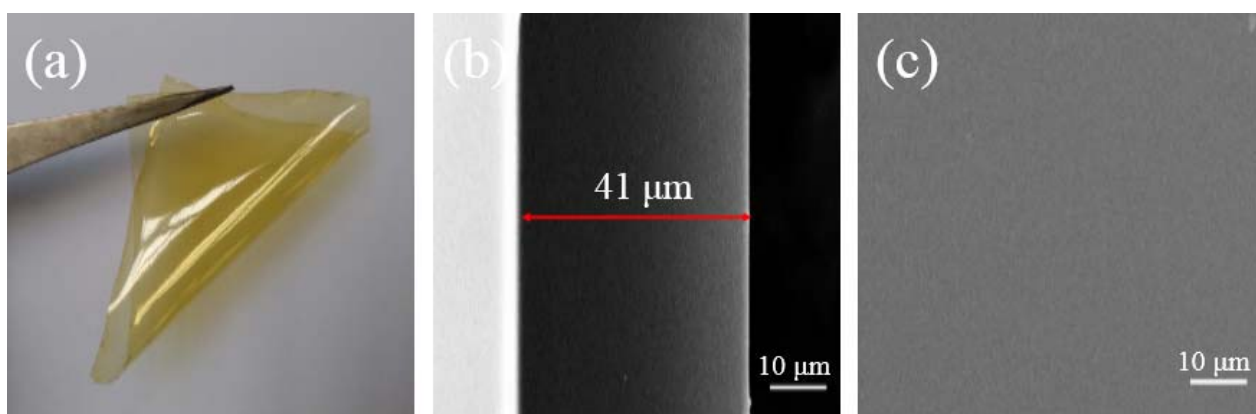

**Fig. S5†** (a) Digital photo and SEM images: (b) cross-section (c) surface of the PES-B100-C16 membrane

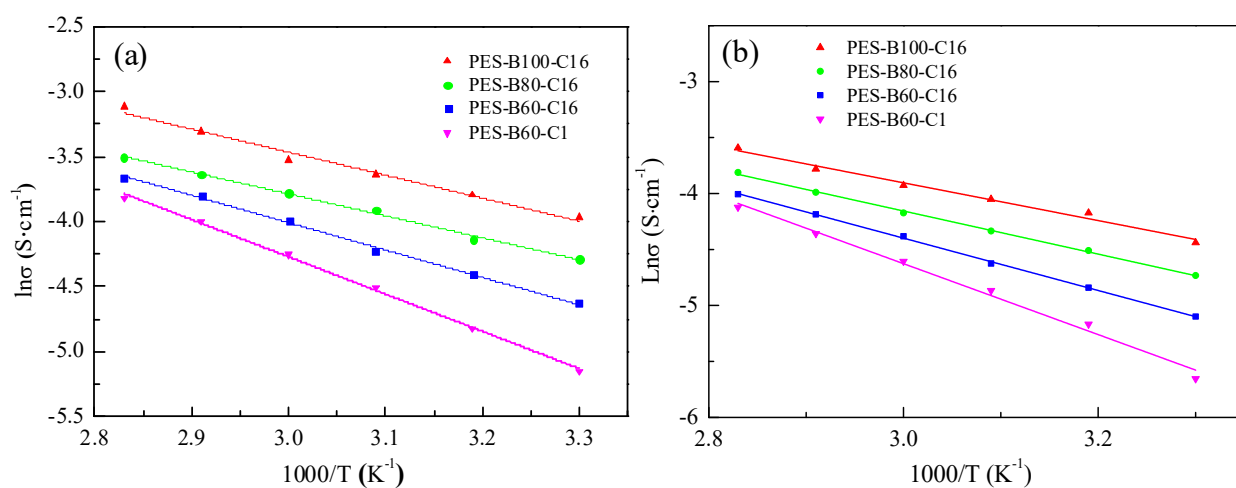

**Fig. S6†** Arrhenius plots for the (a) in-plane and (b) through-plane conductivity of the AEMs

**Table S2†** Solubility of comb-shaped PES-Bx-C16 membranes in commonly used solvents.

|                     | DMF | DMAc | DMSO | NMP | methanol | ethanol | n-propanol |
|---------------------|-----|------|------|-----|----------|---------|------------|
| PES                 | +   | +    | +    | +   | -        | -       | -          |
| PES-Bx <sup>a</sup> | +   | +    | +    | +   | -        | -       | -          |
| PES-B60-C16         | +   | +    | -    | +   | -        | -       | -          |
| PES-B80-C16         | +   | +    | -    | +   | -        | -       | -          |
| PES-B100-C16        | +   | +    | -    | +   | -        | -       | -          |

+ Soluble; - insoluble; <sup>a</sup> x=60, 80 and 100. PES-Bx-C16 is in hydroxide form. All of above were measured at room temperature.

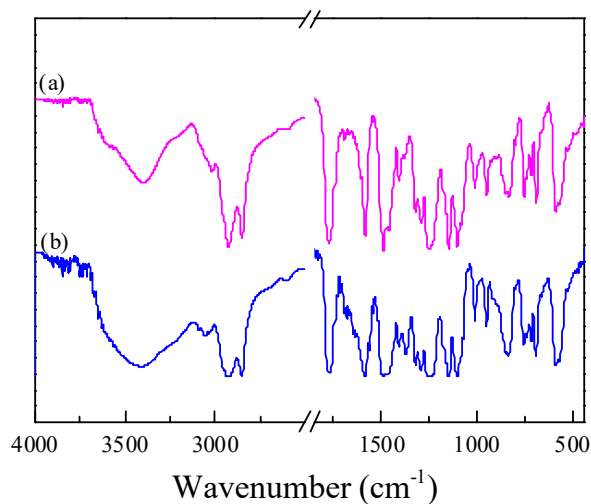

**Fig. S7†** The FT-IR spectra of PES-B100-C16 (a) before and (b) after alkaline stability test

**Table S3†** Permeability of H<sub>2</sub> and O<sub>2</sub> through PES-B100-C16 in hydroxide form at 50 °C.

|              | Gas permeability (cm <sup>3</sup> cm cm <sup>-2</sup> s <sup>-1</sup> cm Hg <sup>-1</sup> ) |                       |
|--------------|---------------------------------------------------------------------------------------------|-----------------------|
|              | H <sub>2</sub>                                                                              | O <sub>2</sub>        |
| PES-B100-C16 | 4.2×10 <sup>-9</sup>                                                                        | 3.2×10 <sup>-10</sup> |

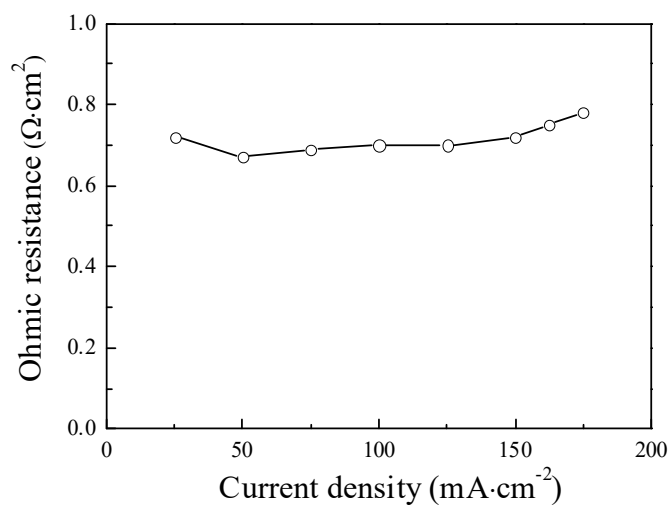

**Fig. S8†** Ohmic resistance of MEA using the PES-B100-C16 membrane
